# Supplementary material for: Towards unconstrained catalyst shaping: high accuracy DLP printing of porous γ-Al2O3-based catalysts
Source: Royal Society of Chemistry journal article supplement (doi:10.1039/d3cy01592k), 2024-01-01
Supplement: d3cy01592k1.pdf [file d3cy01592k1.pdf]

## SUPPORTING MATERIAL

### Toward unconstrained catalyst shaping: high accuracy DLP printing of porous $\gamma$ -Al<sub>2</sub>O<sub>3</sub>-based catalysts

Luca Mastroianni<sup>1,2</sup>, Vincenzo Russo<sup>1,2</sup>, Kari Eränen<sup>1</sup>, Martino Di Serio<sup>2</sup>, Dmitry Murzin<sup>1</sup>, Tapio Salmi<sup>1</sup>

<sup>1</sup> Åbo Akademi University, Laboratory of Industrial Chemistry and Reaction Engineering (TKR), FI-20500 Turku/Åbo, Finland

<sup>2</sup> Università di Napoli “Federico II”, Chemical Sciences Department, IT-80126 Napoli, Italy

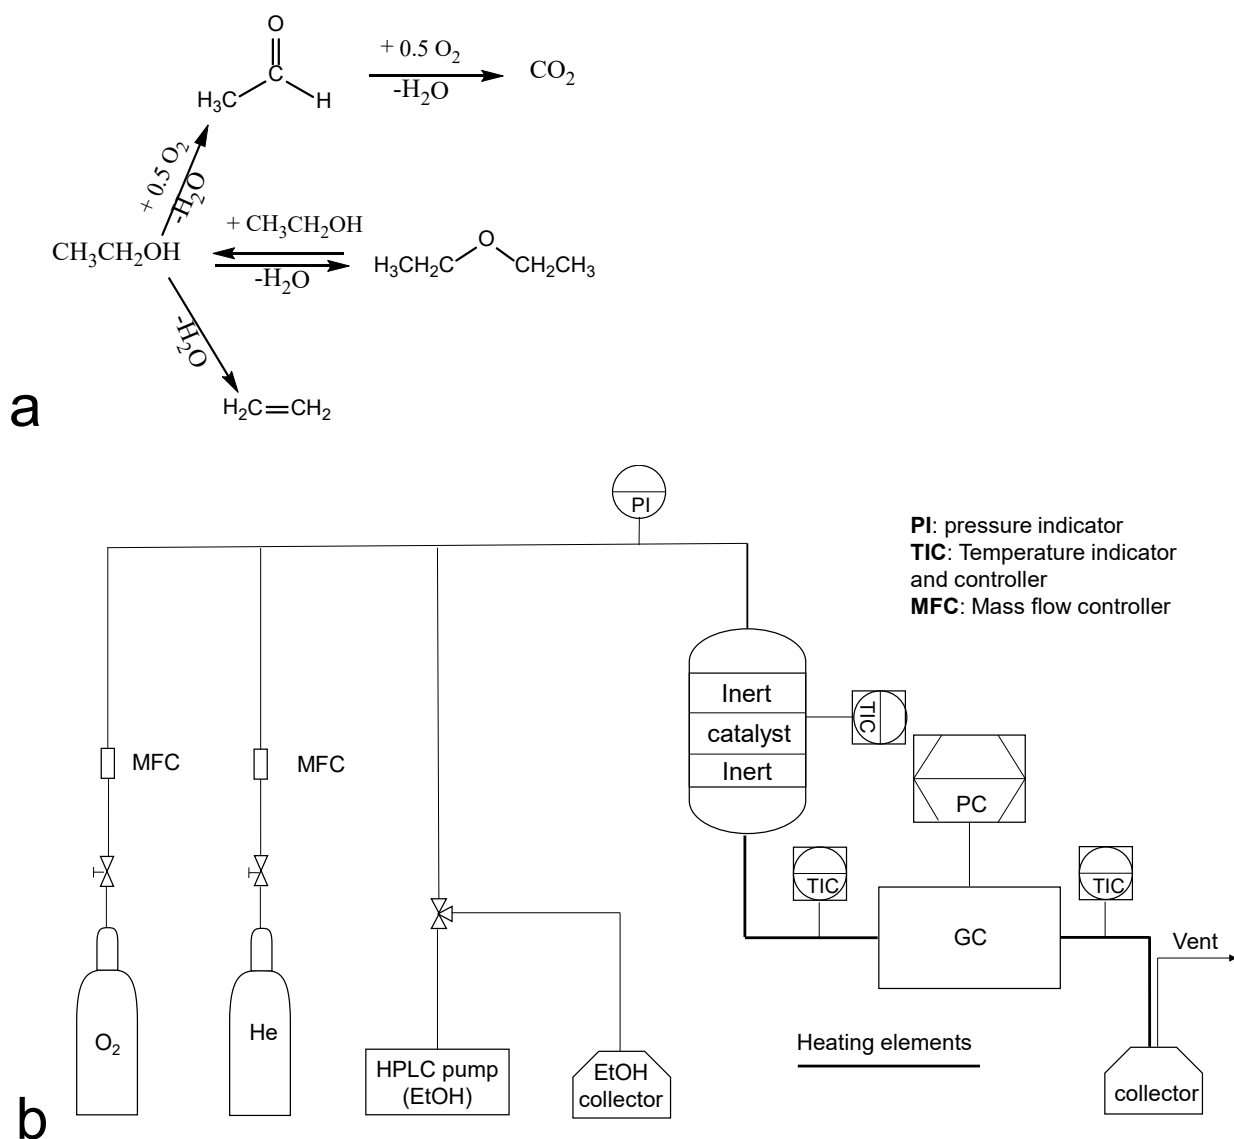

**Figure S1.** a) Observed reaction network in ethanol transformation and b) schematic process flow diagram.

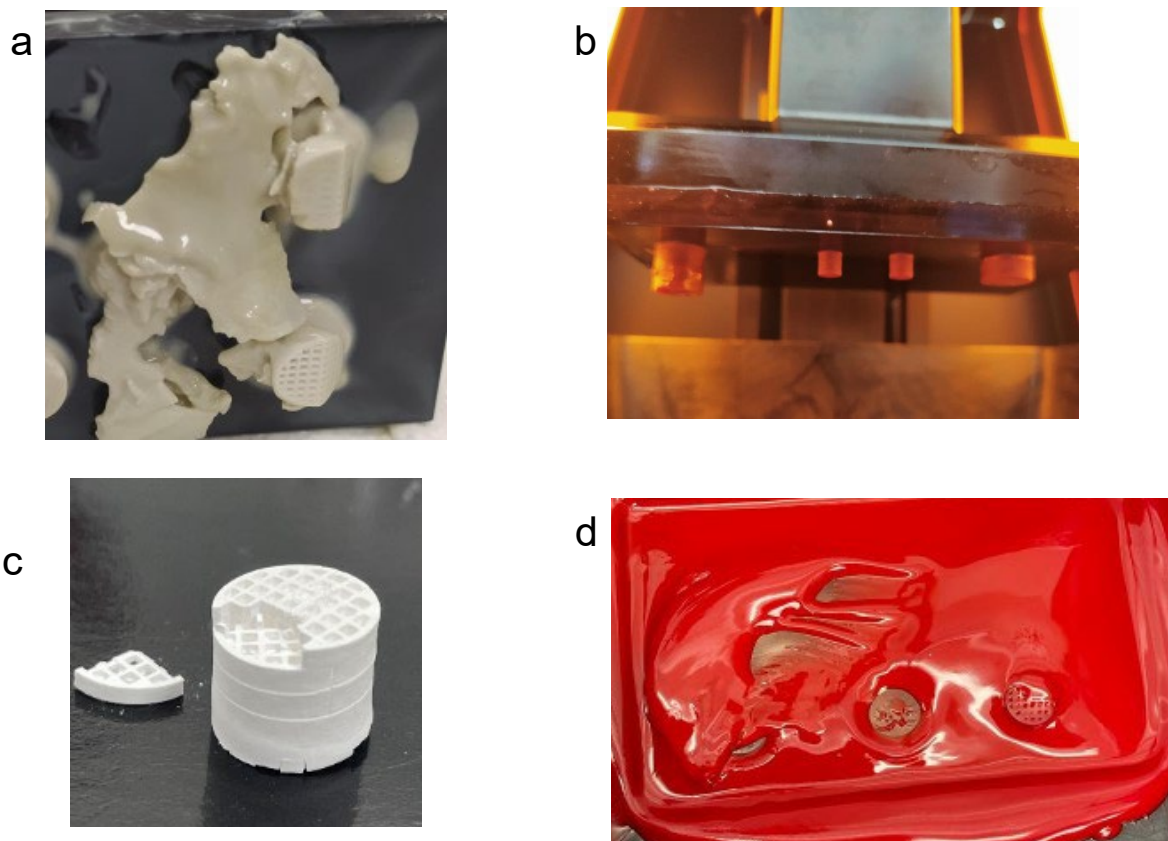

**Figure S2.** a) Printing failure because of overcuring b) successful print c) cracks and delamination after debinding and d) example of failure with too high viscosity resins.

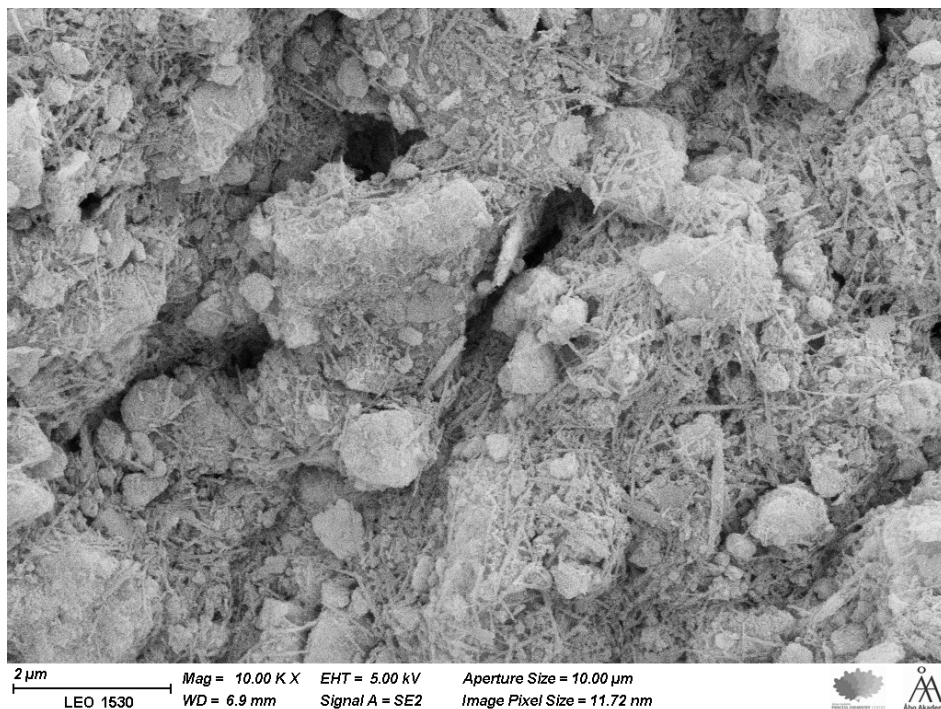

**Figure S3.** SEM micrograph of a 3D printed  $\text{Al}_2\text{O}_3$ /attapulgite sample. The quasi-spherical particles represent  $\text{Al}_2\text{O}_3$  while the needle-shaped particles are the attapulgite.

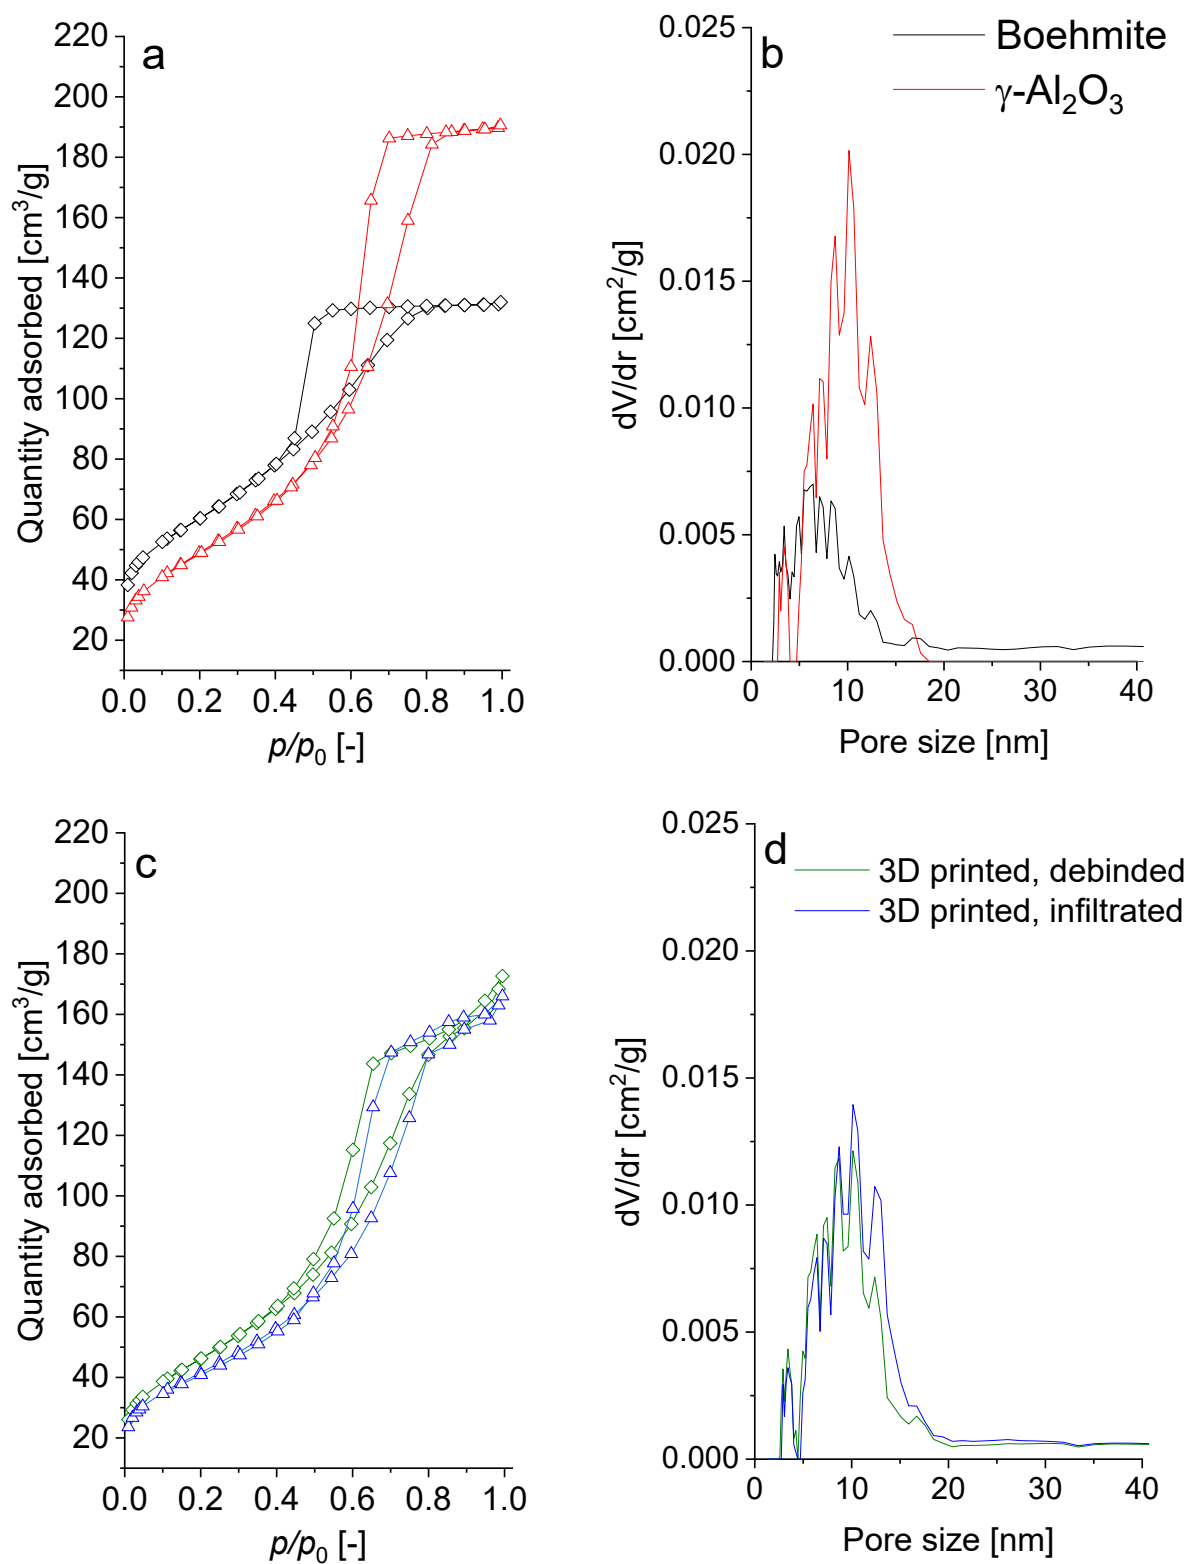

**Figure S4.** a) and c) Adsorption isotherms; b) and d) pore size distributions of boehmite and  $\gamma\text{-Al}_2\text{O}_3$  at different steps of the printing procedure.

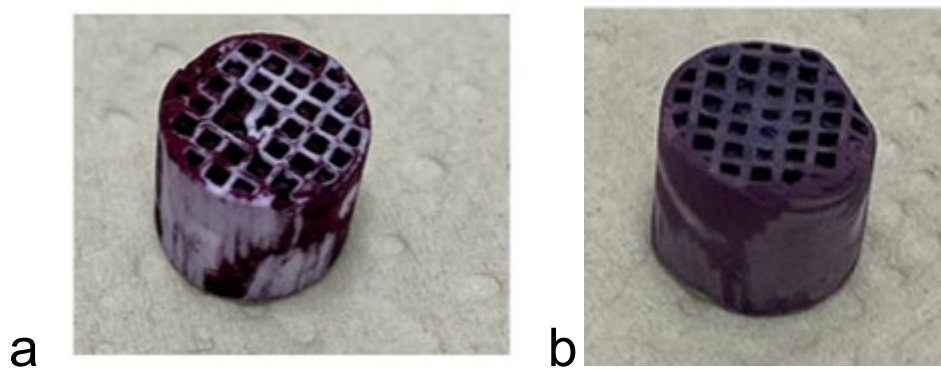

**Figure S5.** Visual inspections of the Au/Al<sub>2</sub>O<sub>3</sub> catalysts prepared with a) DPU and b) DP method.

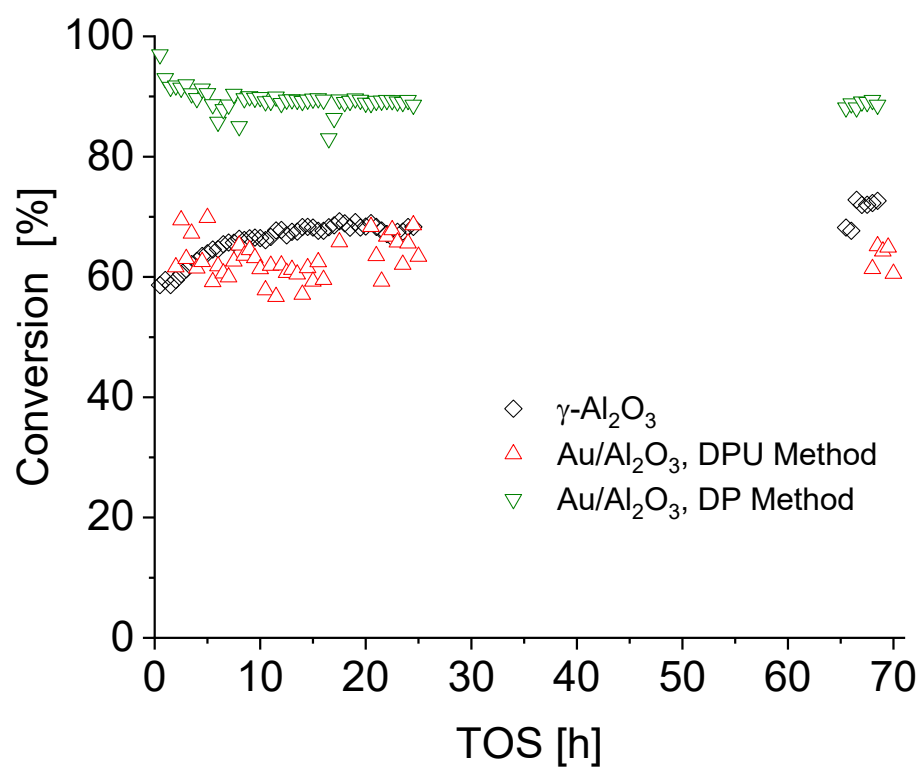

**Figure S6.** Conversion as a function of Time On Stream for different 3D printed catalysts. The temperature was set at 250 °C ; the other operating conditions are listed in section 2.5.
